# Supplementary material for: Structural and functional analysis of EntV reveals a 12 amino acid fragment protective against fungal infections
Source: PubMed Central journal article supplement (PMC9562342; doi:10.1038/s41467-022-33613-1), 2022-10-13
Supplement: 41467_2022_33613_MOESM2_ESM.pdf [file 41467_2022_33613_MOESM2_ESM.pdf]

## **Description of Additional Supplementary Files**

**Title:** Supplementary Data 1 (xlsx):

**Description:** C. elegans survival experiments' statistics and replicates III.

**Title:** Supplementary Data 2 (pdf):

**Description:** HPLC and mass spectrometry verification of all peptides
