# Supplementary material for: Structural and functional analysis of EntV reveals a 12 amino acid fragment protective against fungal infections
Source: PubMed Central journal article supplement (PMC9562342; doi:10.1038/s41467-022-33613-1), 2022-10-13
Supplement: 41467_2022_33613_MOESM4_ESM.pdf [file 41467_2022_33613_MOESM4_ESM.pdf]

# sEntV

Column: 250X4.6mm 5u C18 120A  
Solvent: A:0.05%TFA in Water; B: 0.05 % TFA in ACN  
ID :

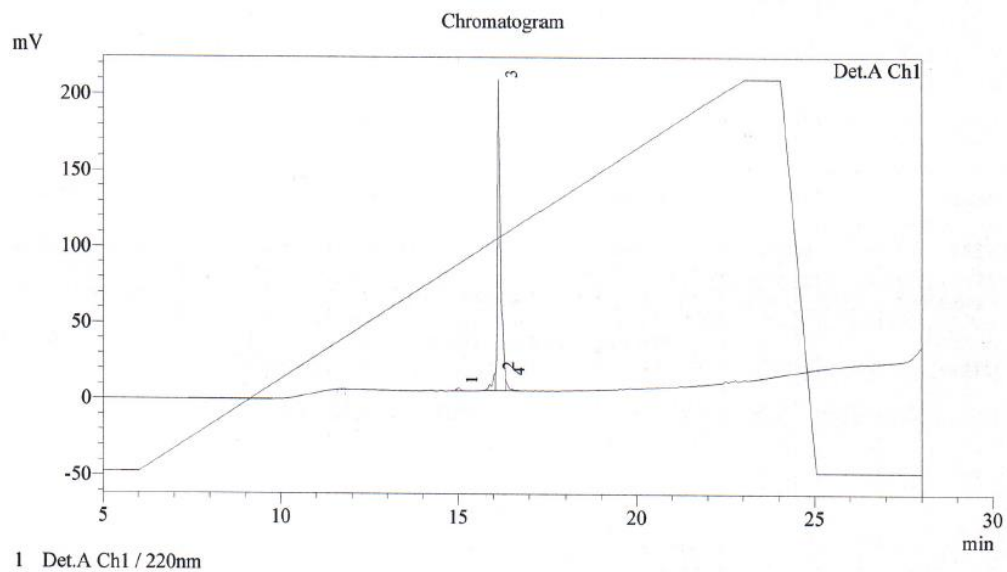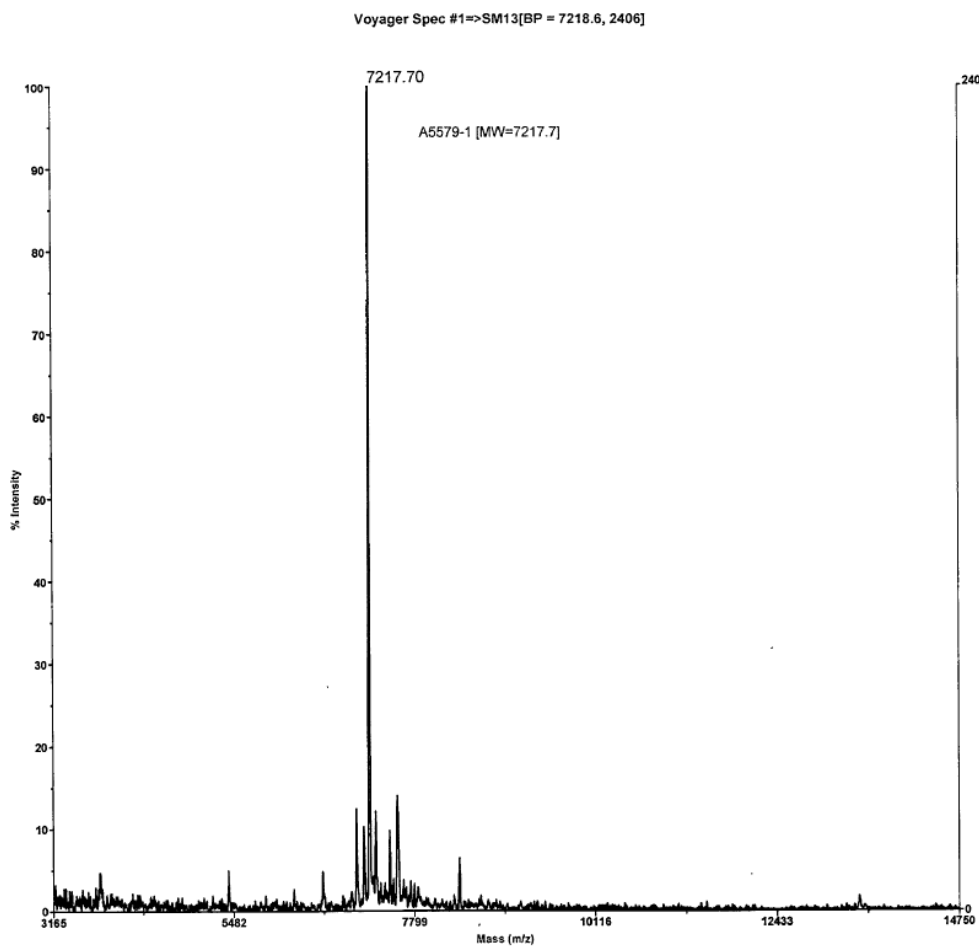

**α4**

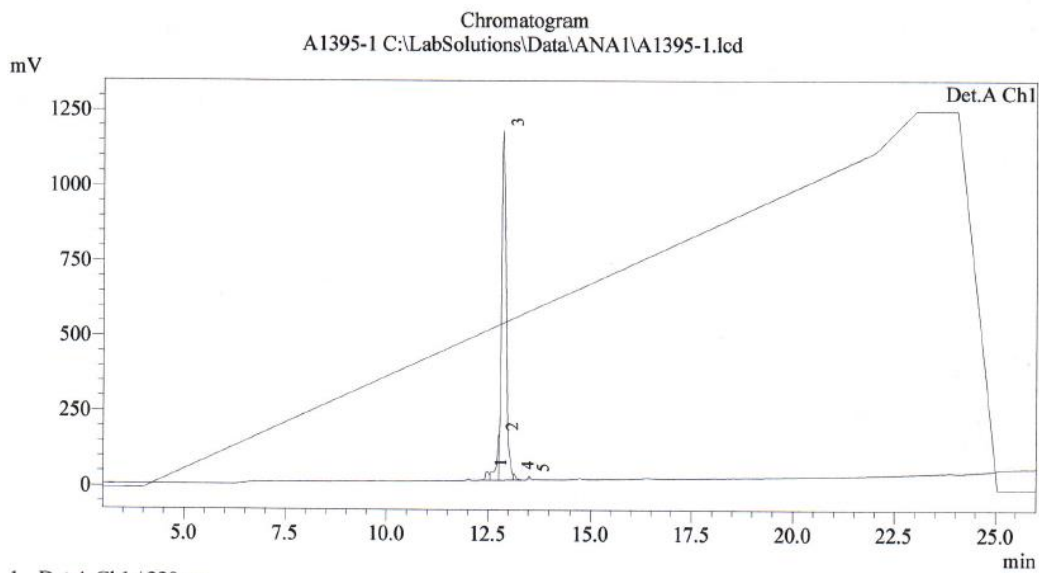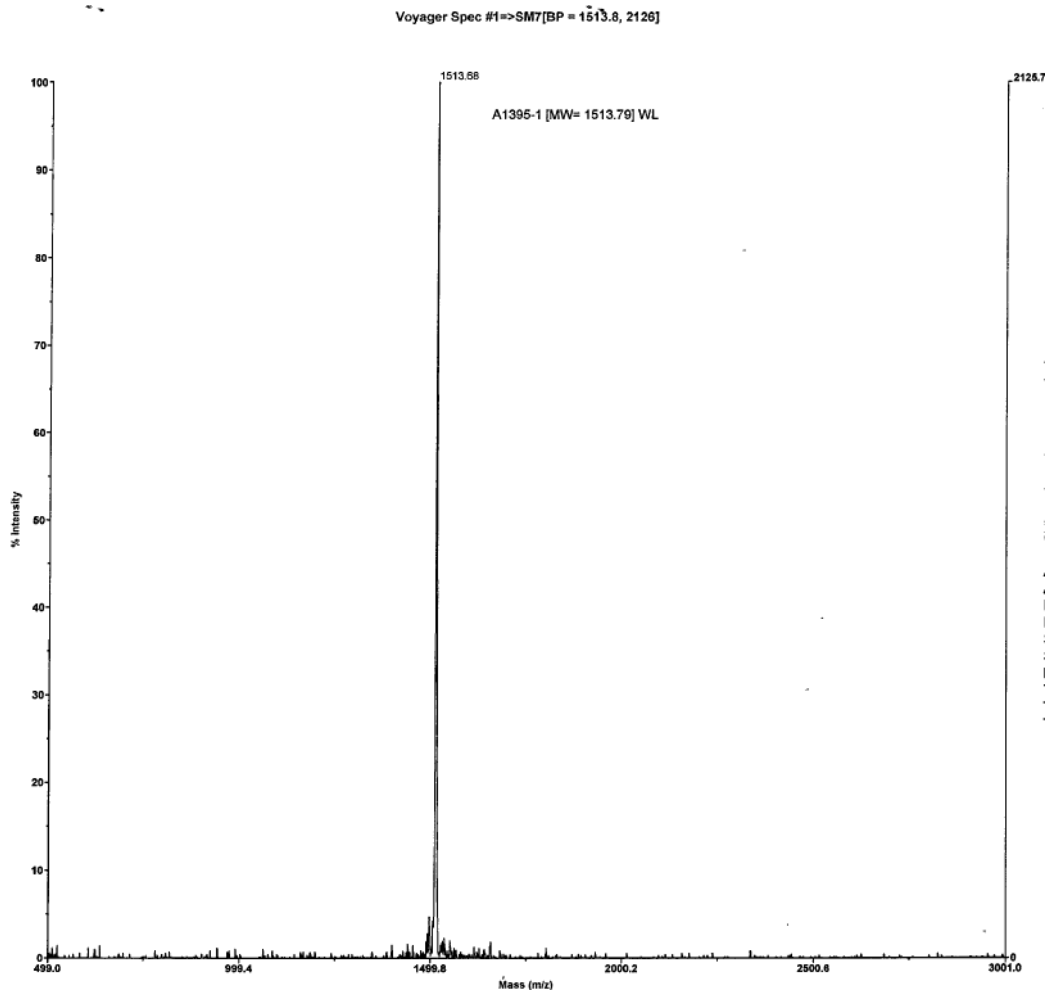

**α5**

Chromatogram  
A1395-2 C:\LabSolutions\Data\ANA1\A1395-2.lcd

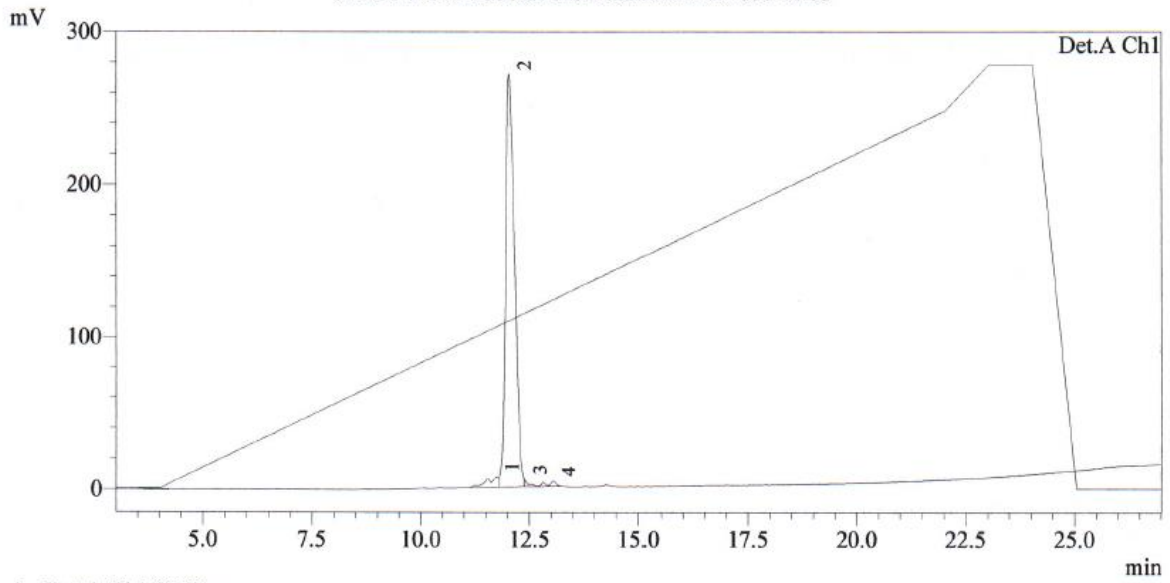

1 Det.A Ch1 / 220nm

Voyager Spec #1=>SM7[BP = 1426.2, 1718]

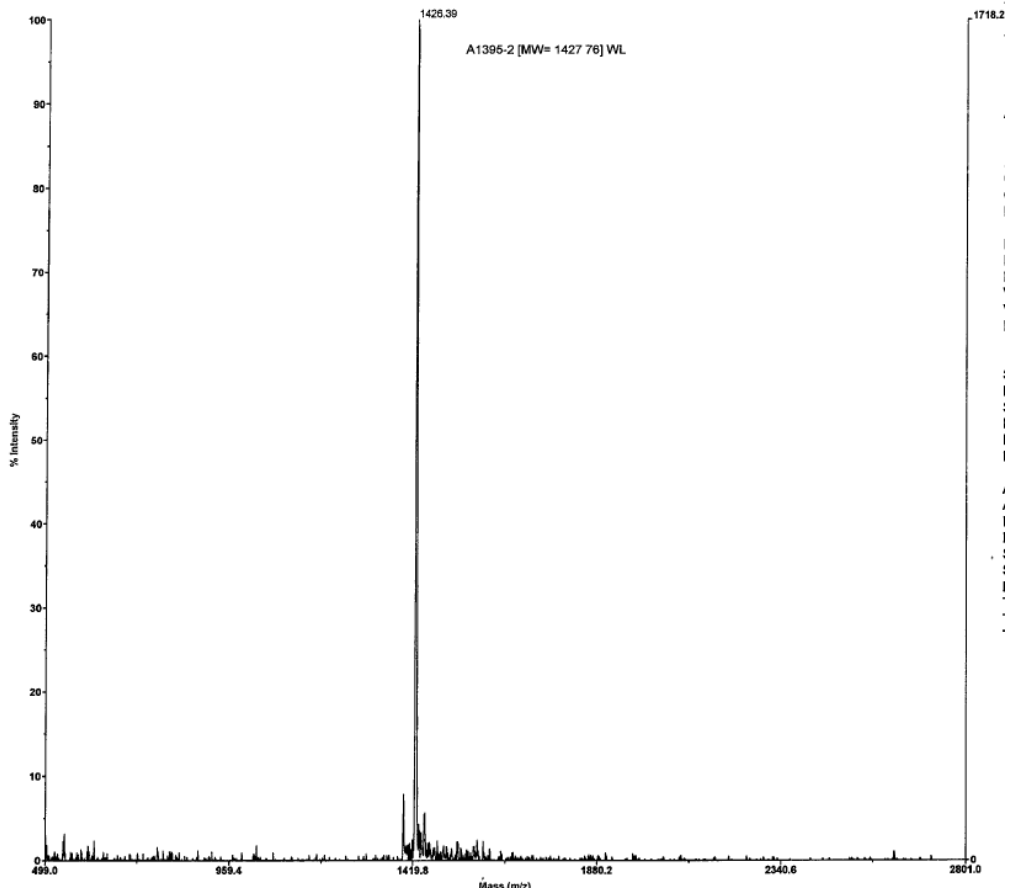

**α6**

Chromatogram  
A1395-3 C:\LabSolutions\Data\ANA1\A1395-3.lcd

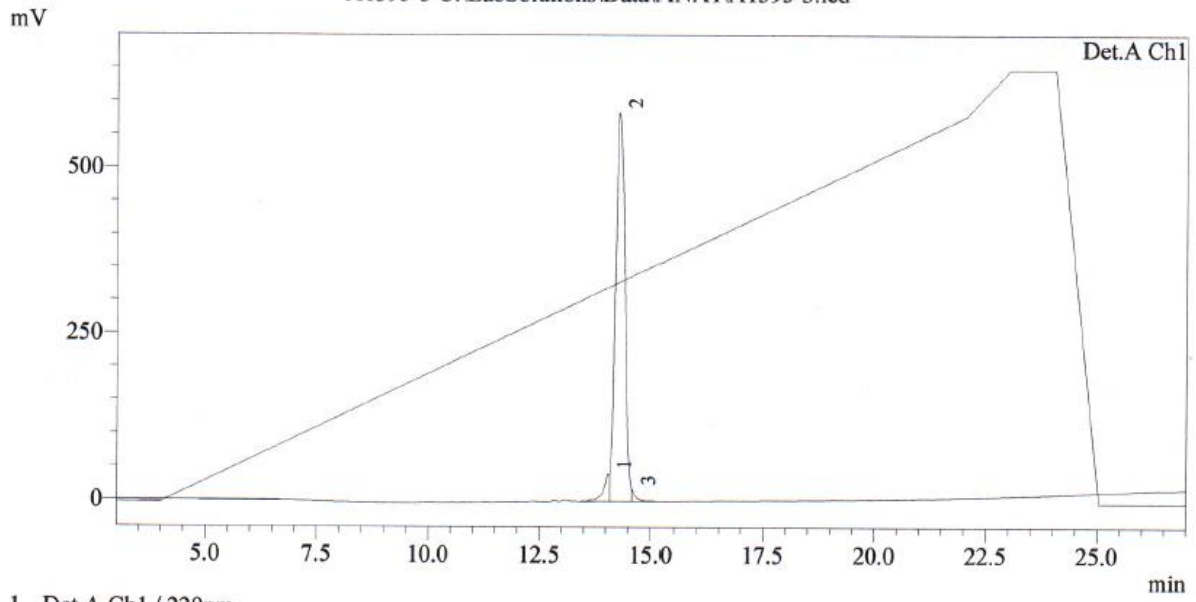

Voyager Spec #1=>SM5=>AdvBC(32,0.5,0.1)[BP = 2116.0, 13009]

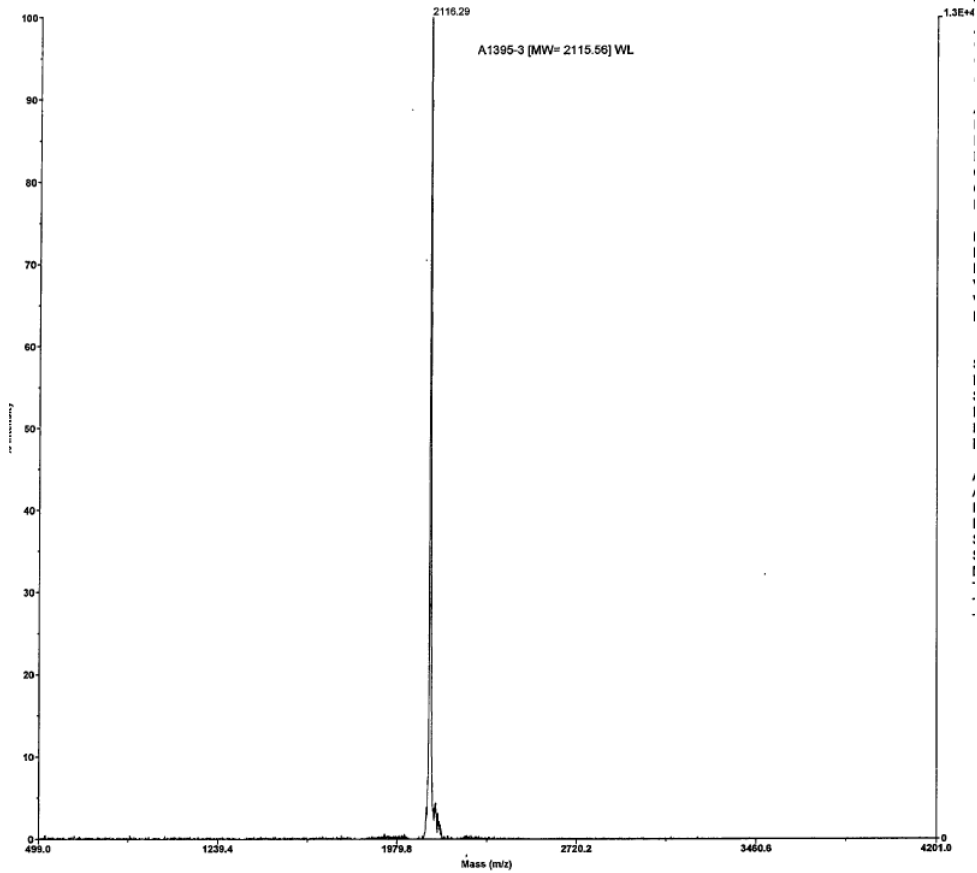

**α7**

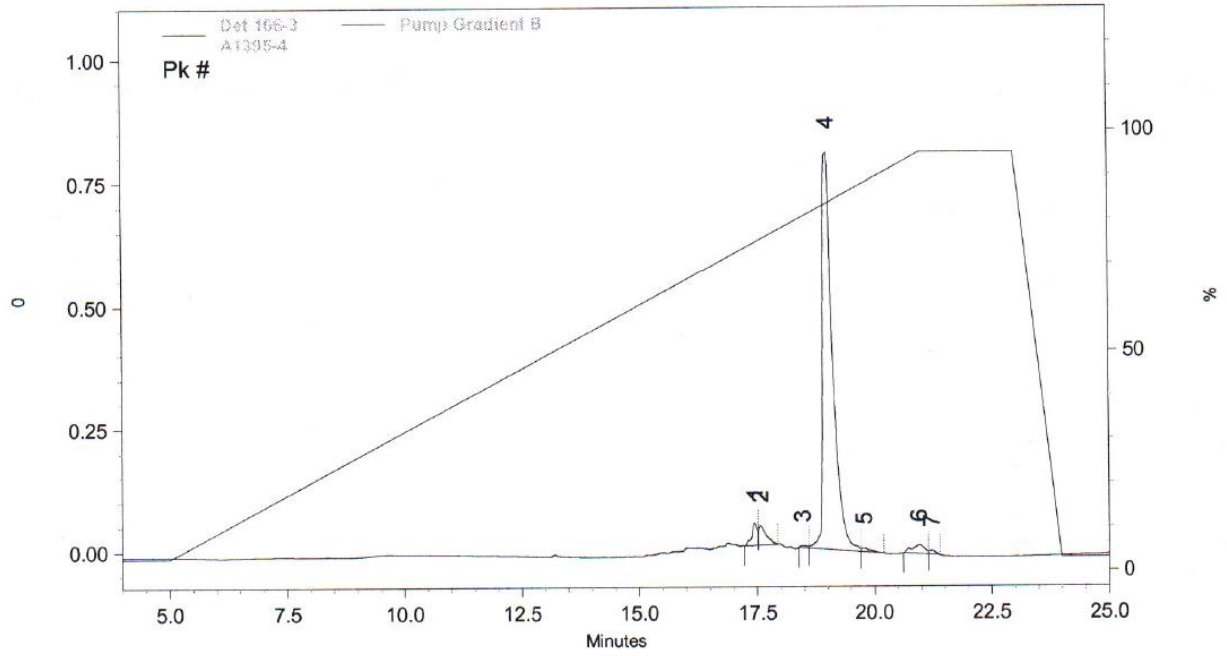

Voyager Spec #1=>SM5=>AdvBC(32,0.5,0.1)[BP = 2028.5, 4763]

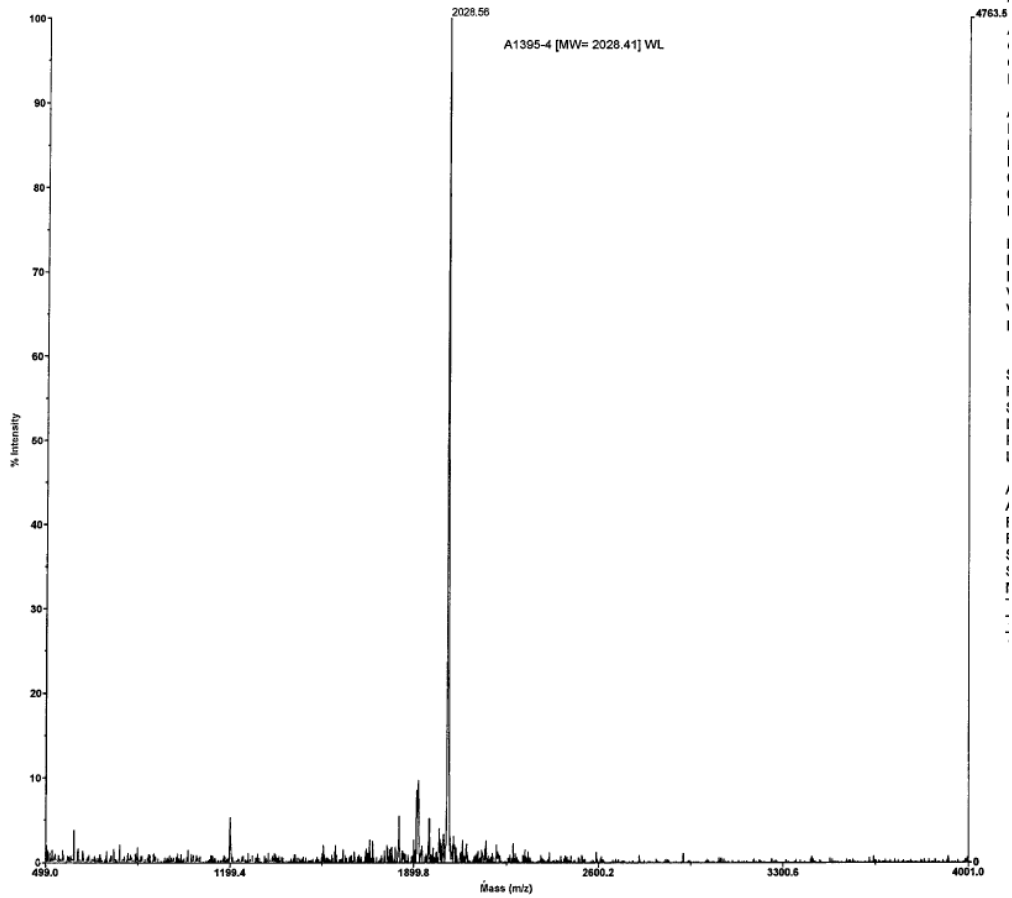

**α4-6**

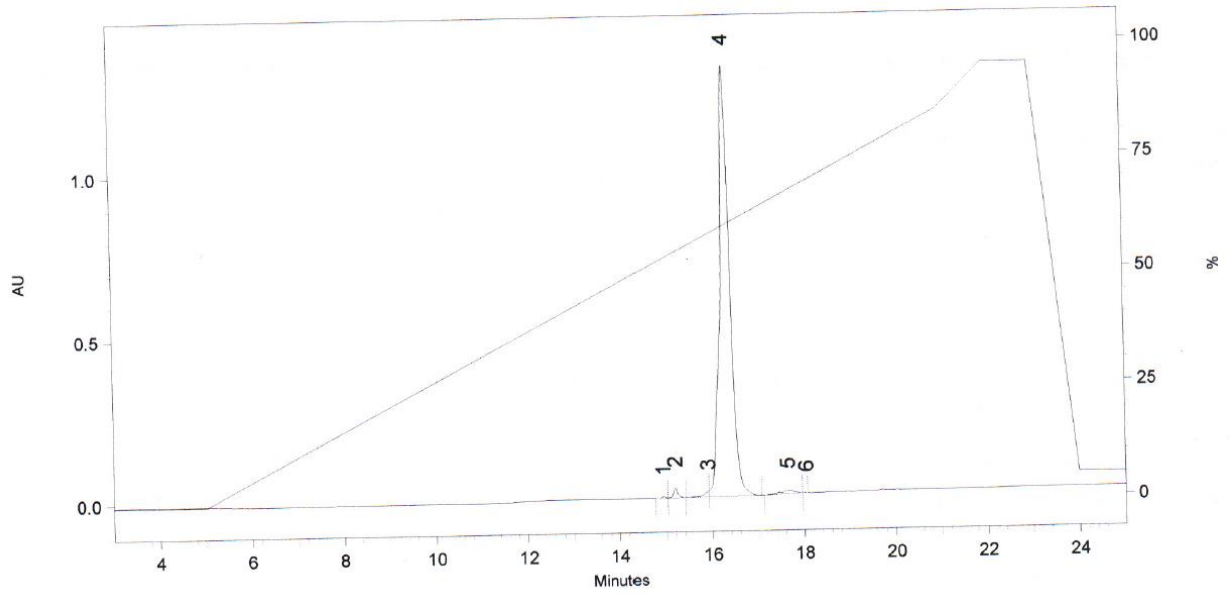

Voyager Spec #1=>SMS=>AdvBC(32.0.5,0.1)[BP = 4621.5, 1871]

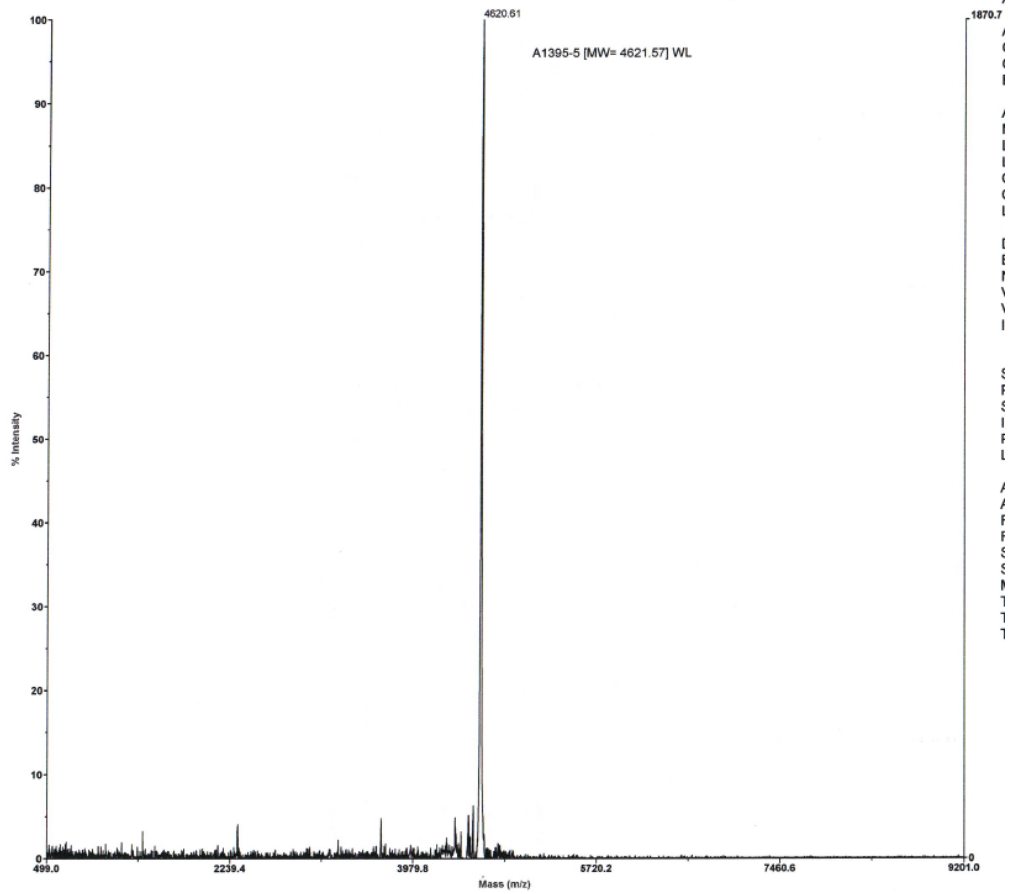

# $\alpha$ 7-random

## Chromatogram

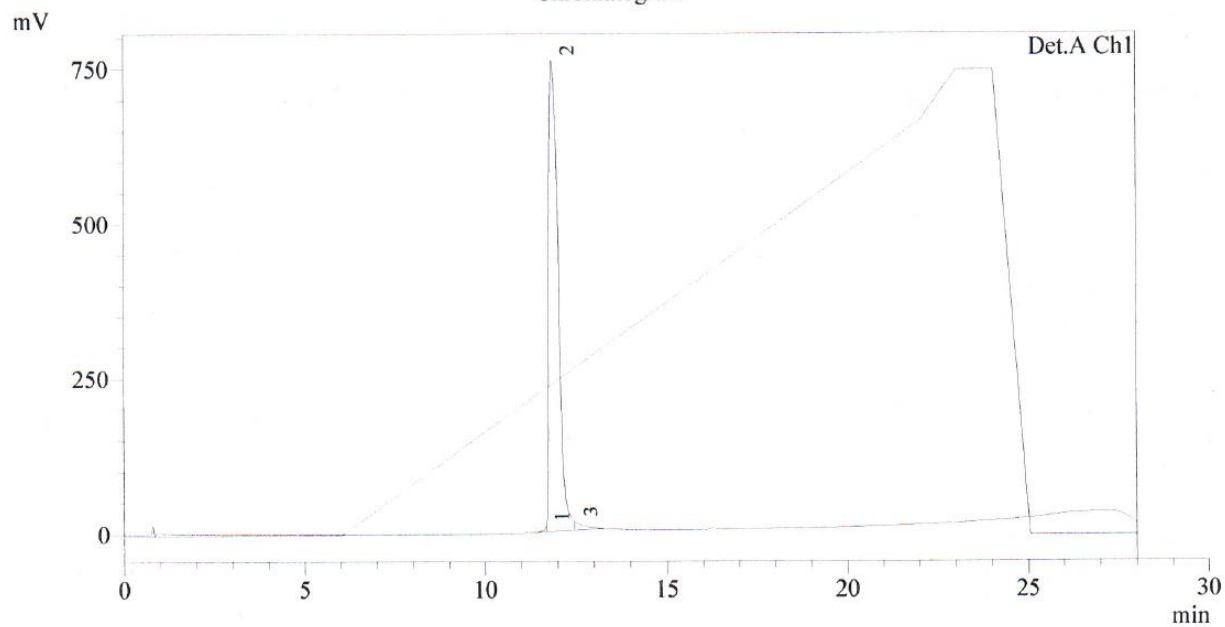

1 Det.A Ch1 / 220nm

Voyager Spec #1=>BC=>NF1.0=>SM7[BP = 2028.0, 2151]

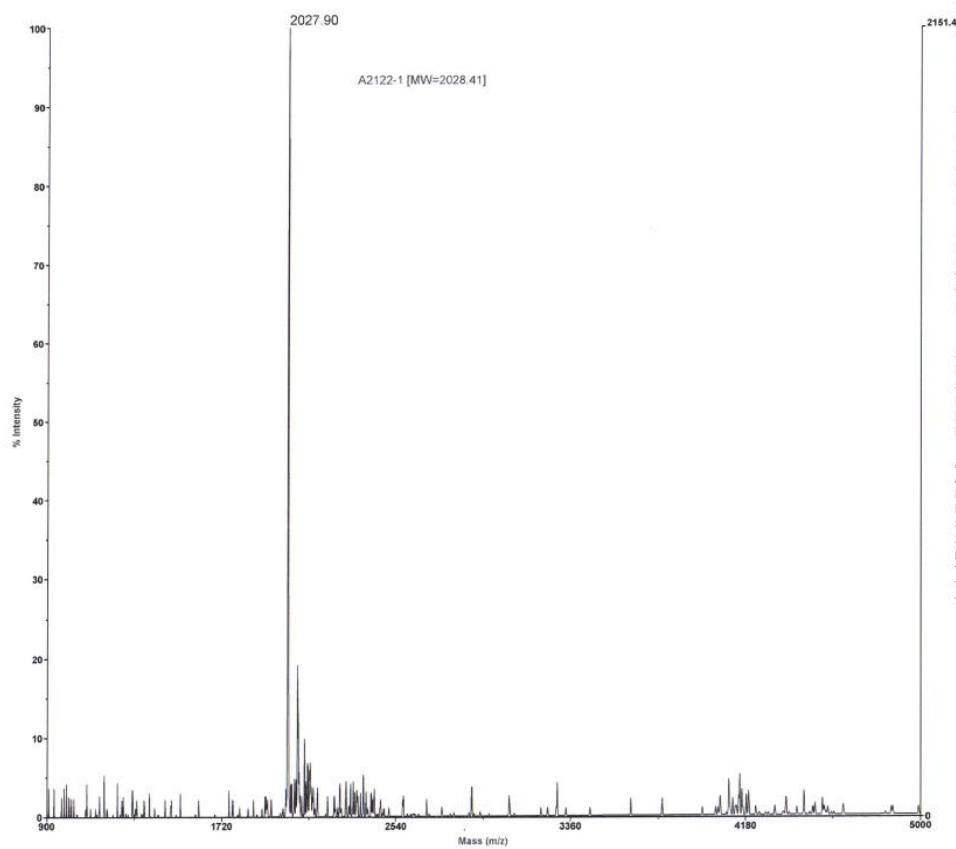

# $\alpha 7$ -disrupted

## Chromatogram

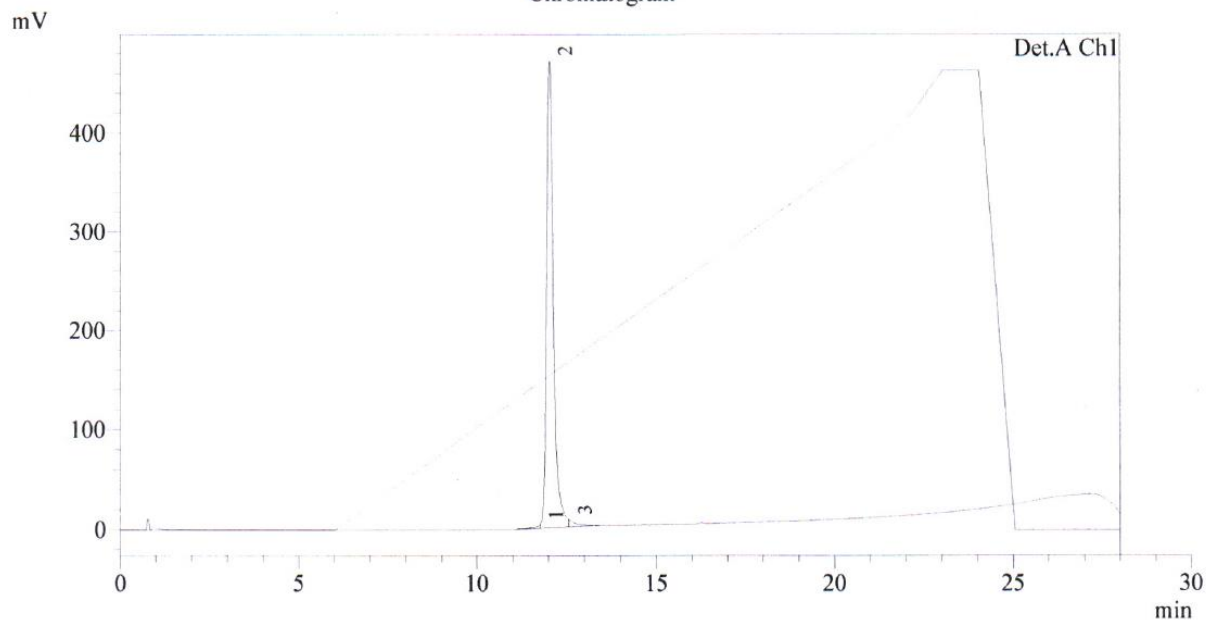

I Det.A Ch1 / 220nm

Voyager Spec #1[BP = 2028.5, 12960]

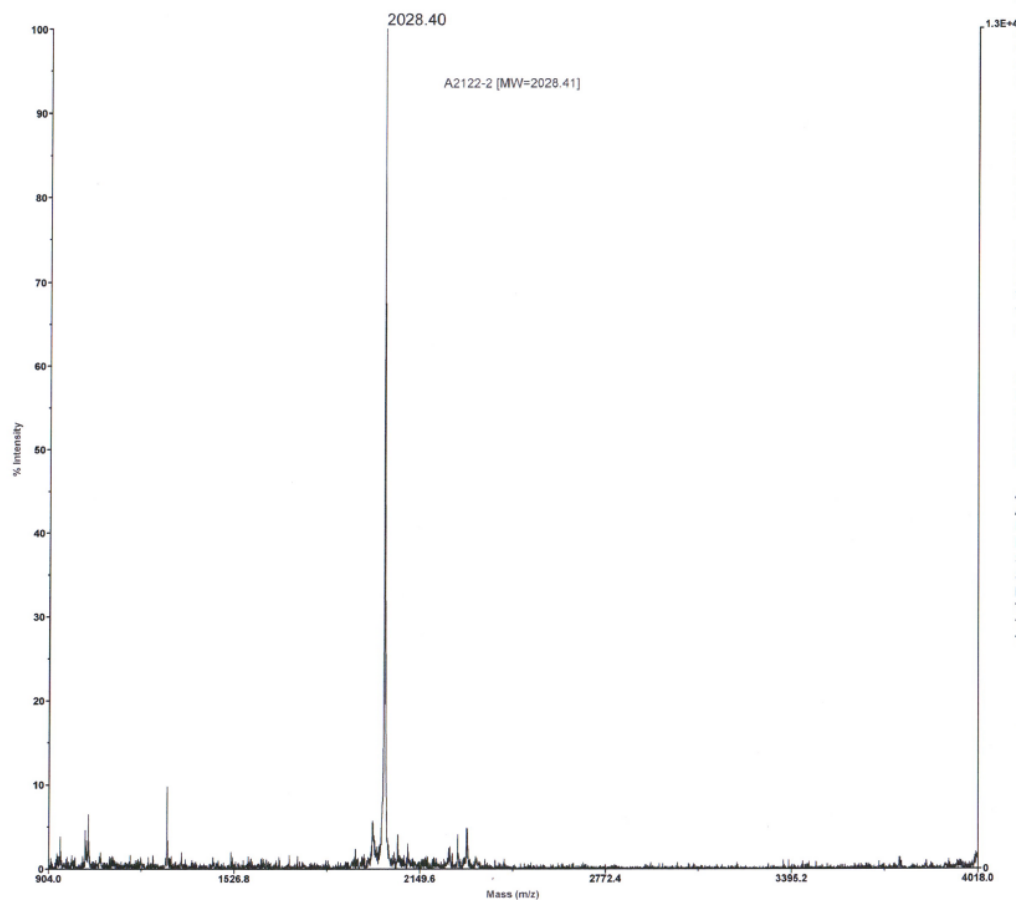



# 16aa

## Chromatogram

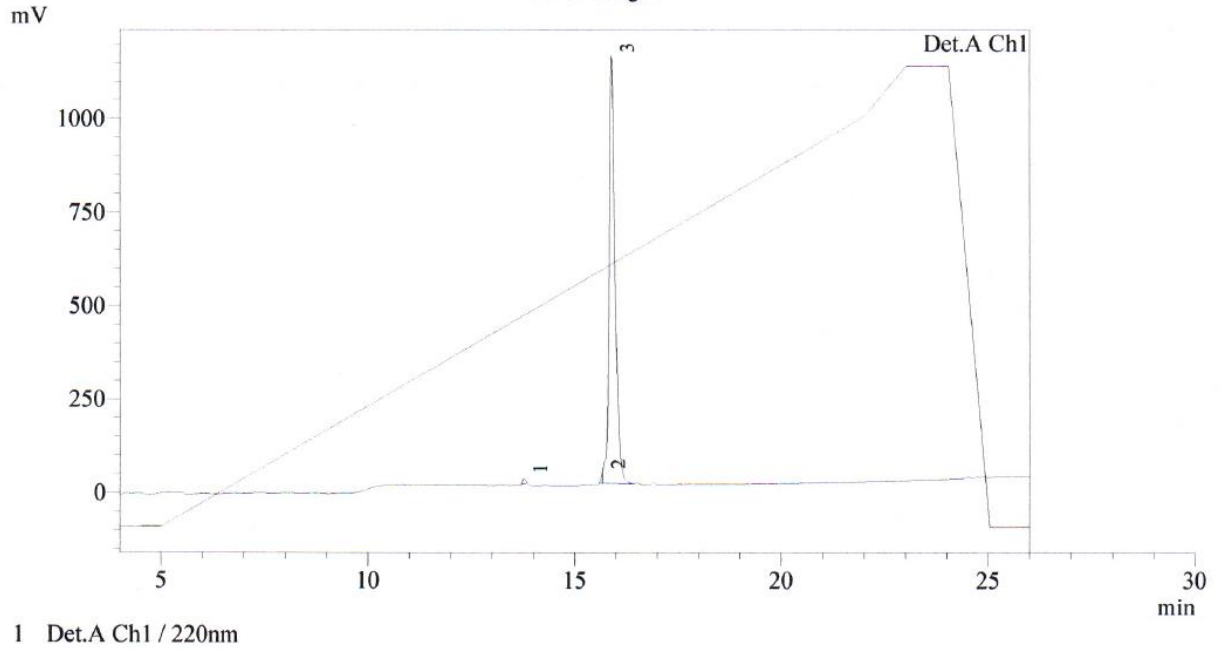

Voyager Spec #1=>SM7[BP = 1611.5, 28165]

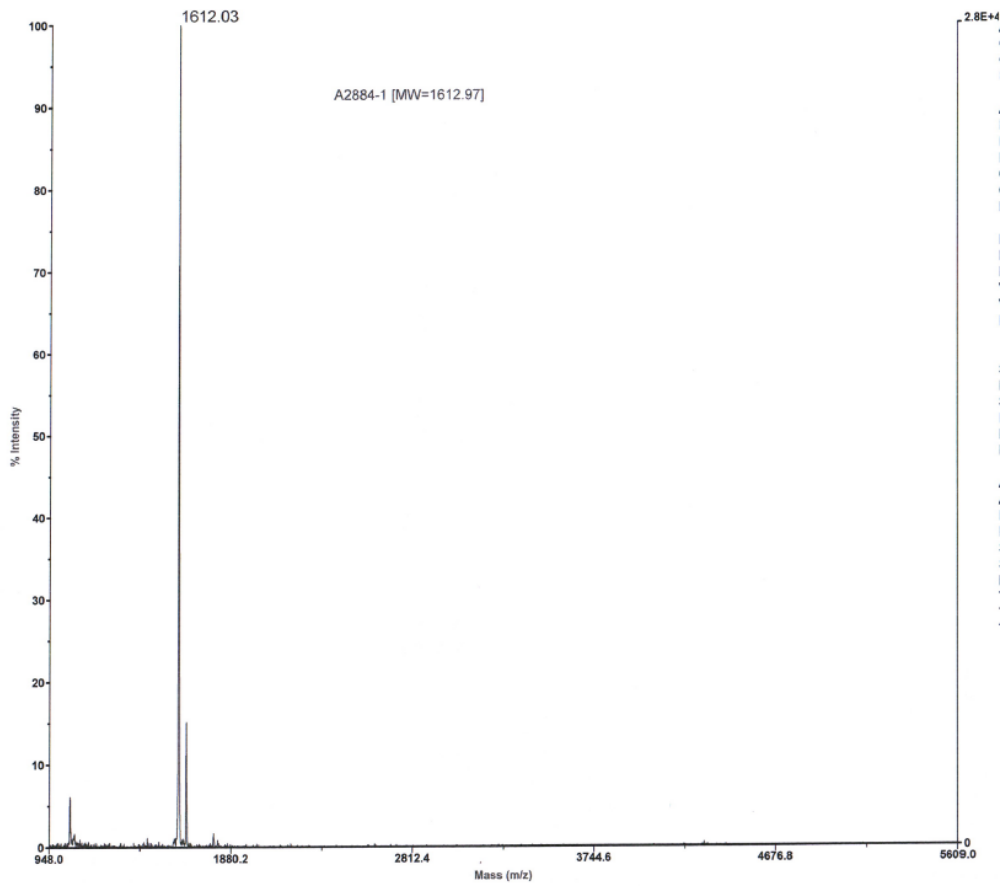

# 14aa-I

## Chromatogram

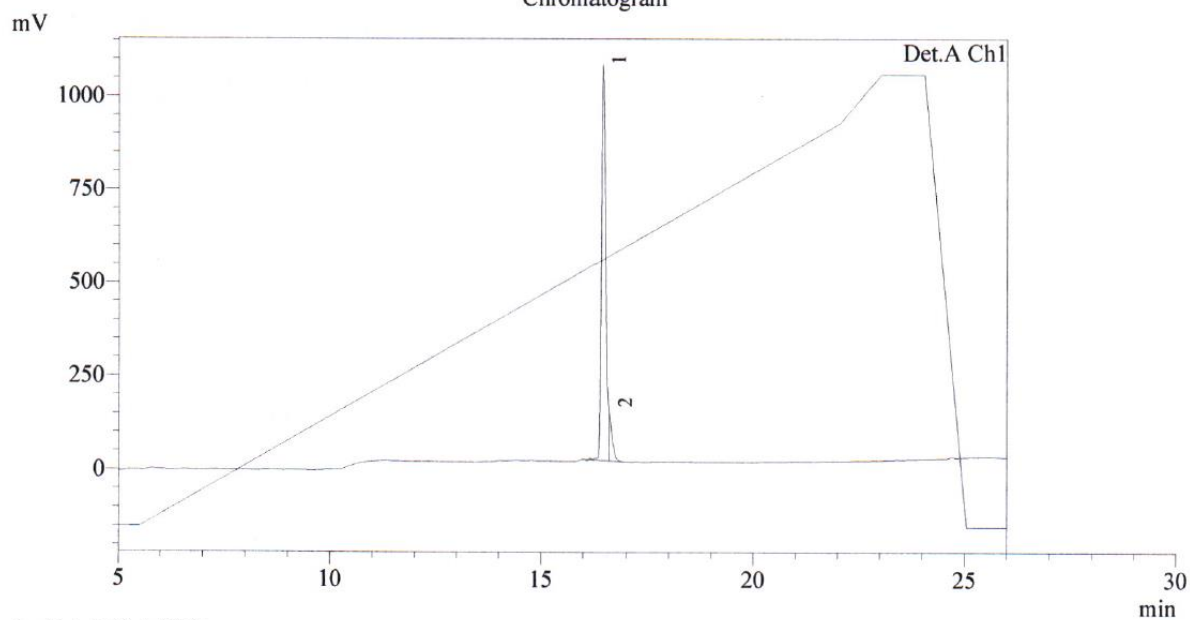

1 Det.A Ch1 / 220nm

## Voyager Spec #1[BP = 1484.3, 5107]

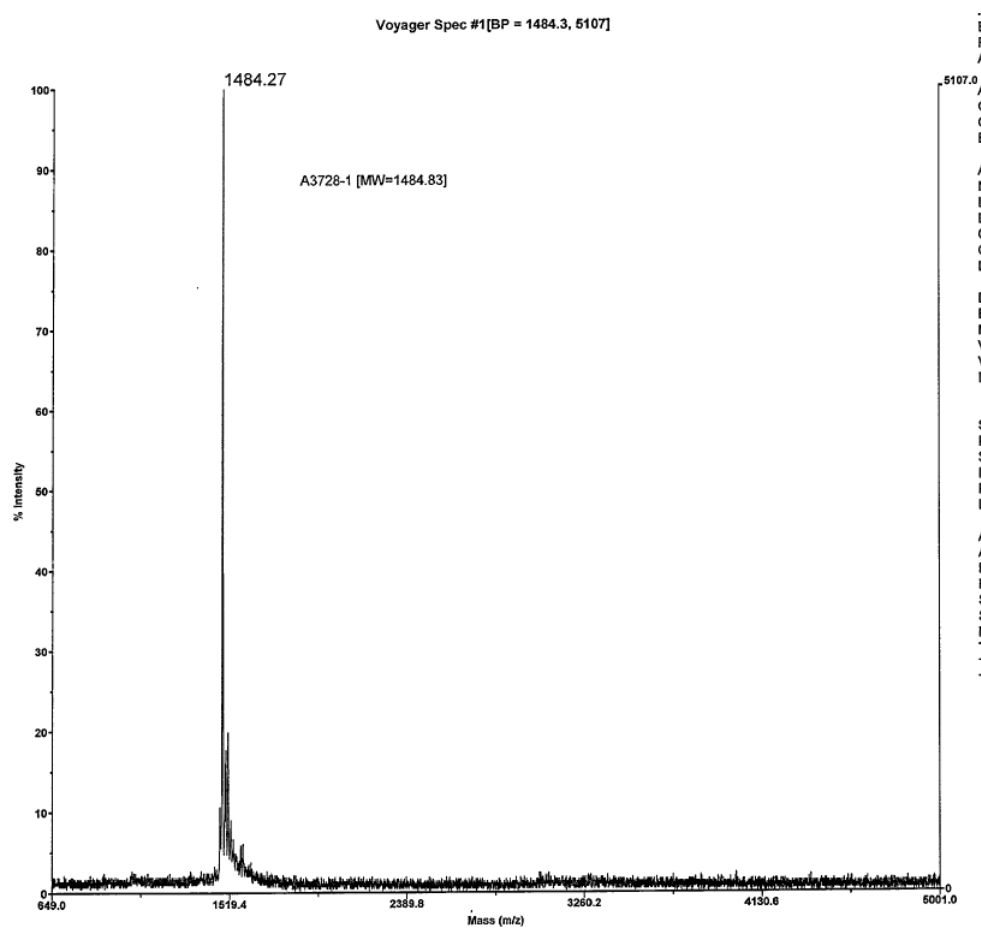

# 14aa-II

## Chromatogram

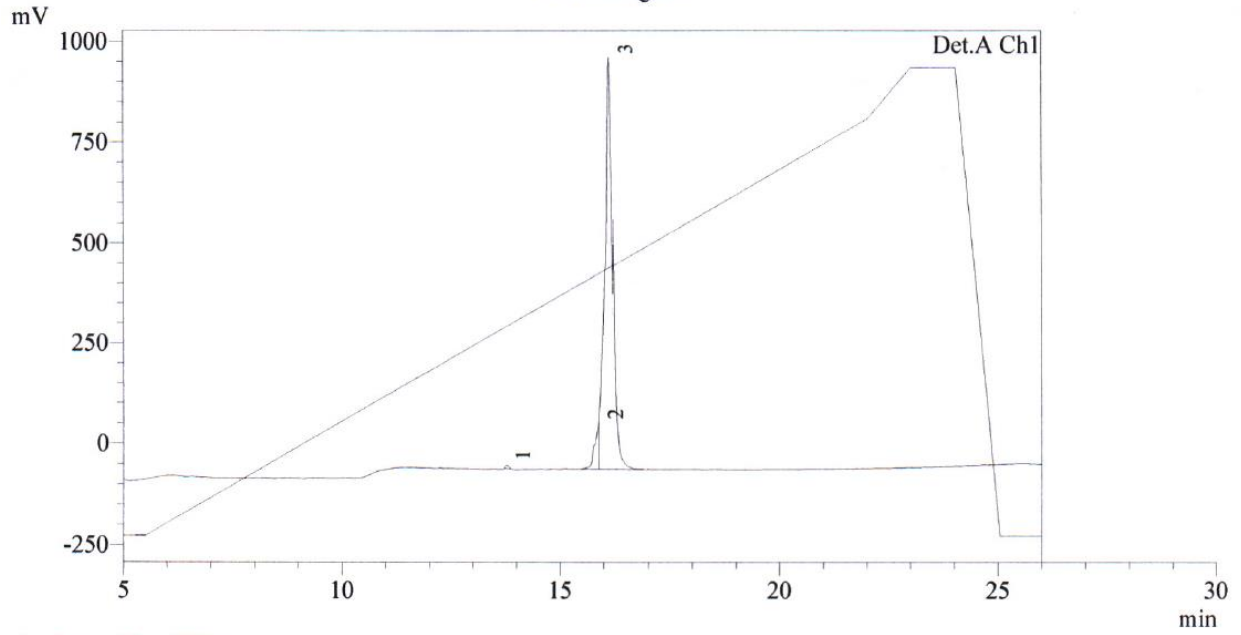

1 Det.A Ch1 / 220nm

Voyager Spec #1=>BC=>SM13[BP = 1452.9, 1816]

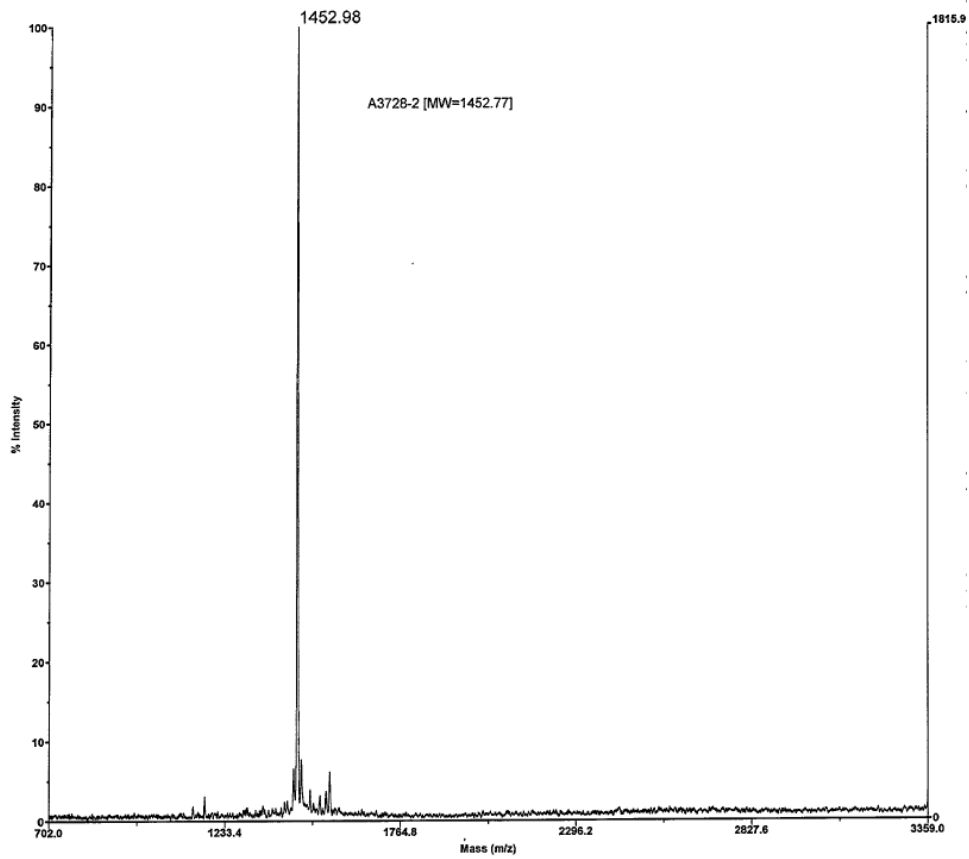

# 13aa

Chromatogram  
C:\LabSolutions\Data\Project I\Anapep24\A4090-1.lcd

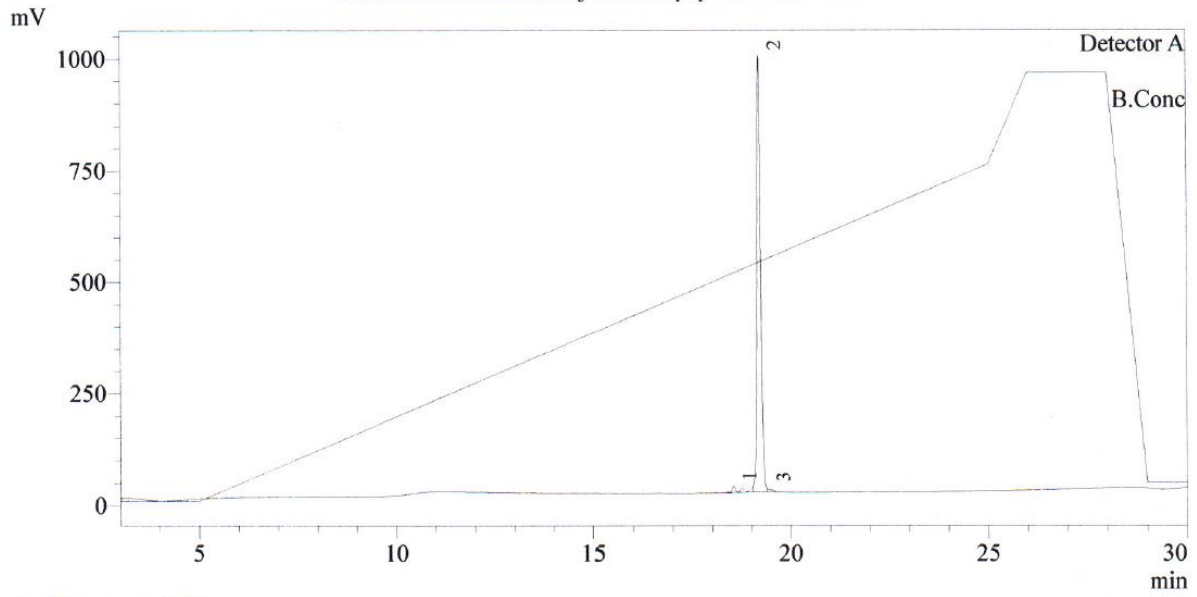

1 Detector A / 220nm

Voyager Spec #1=>SM5[BP = 1371.9, 1592]

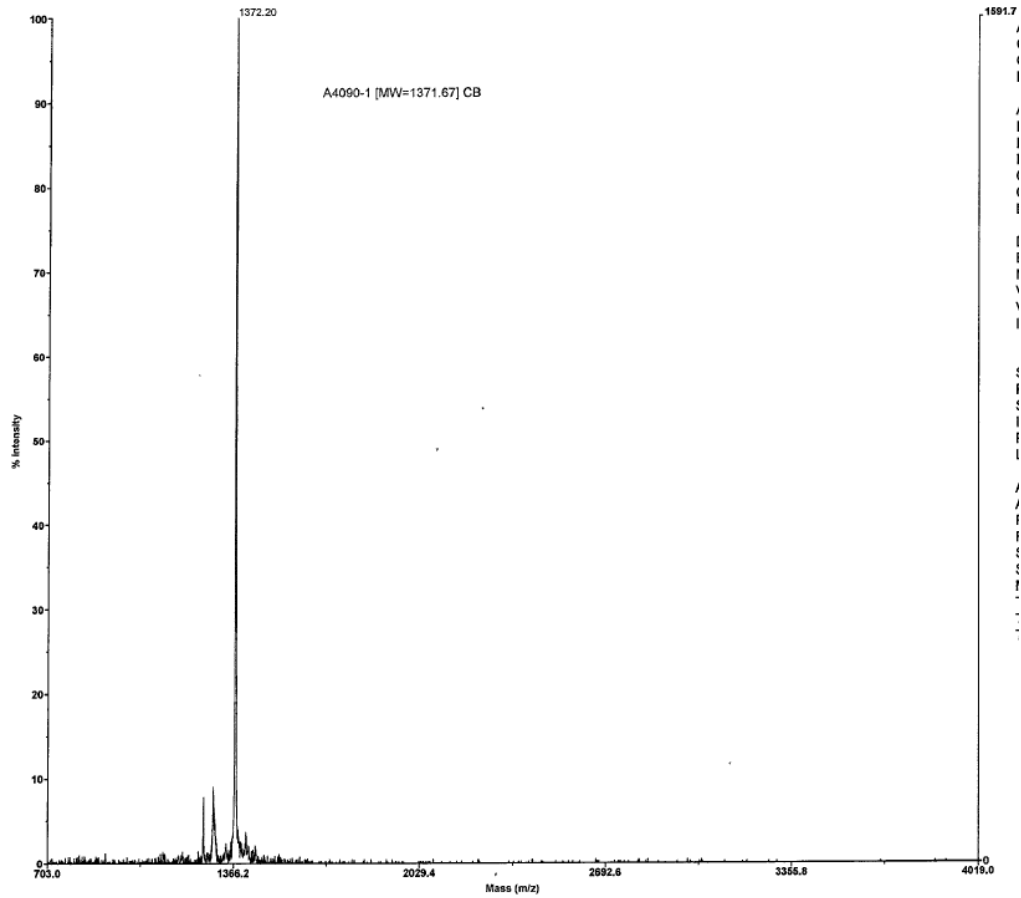

# 12aa

Chromatogram

C:\LabSolutions\Data\Project1\Anapep24\A4090-2A.lcd

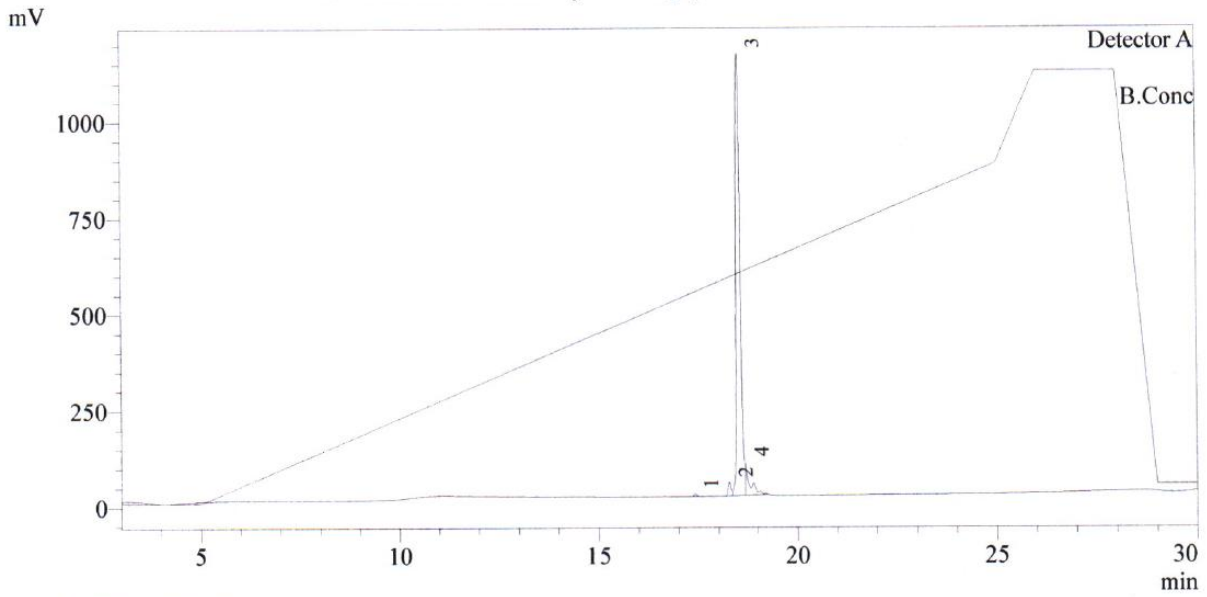

1 Detector A / 220nm

Voyager Spec #1=>SMS=>NR(2.00)>AdvBC(32.0.5.0.1)[BP = 1258.0, 1463]

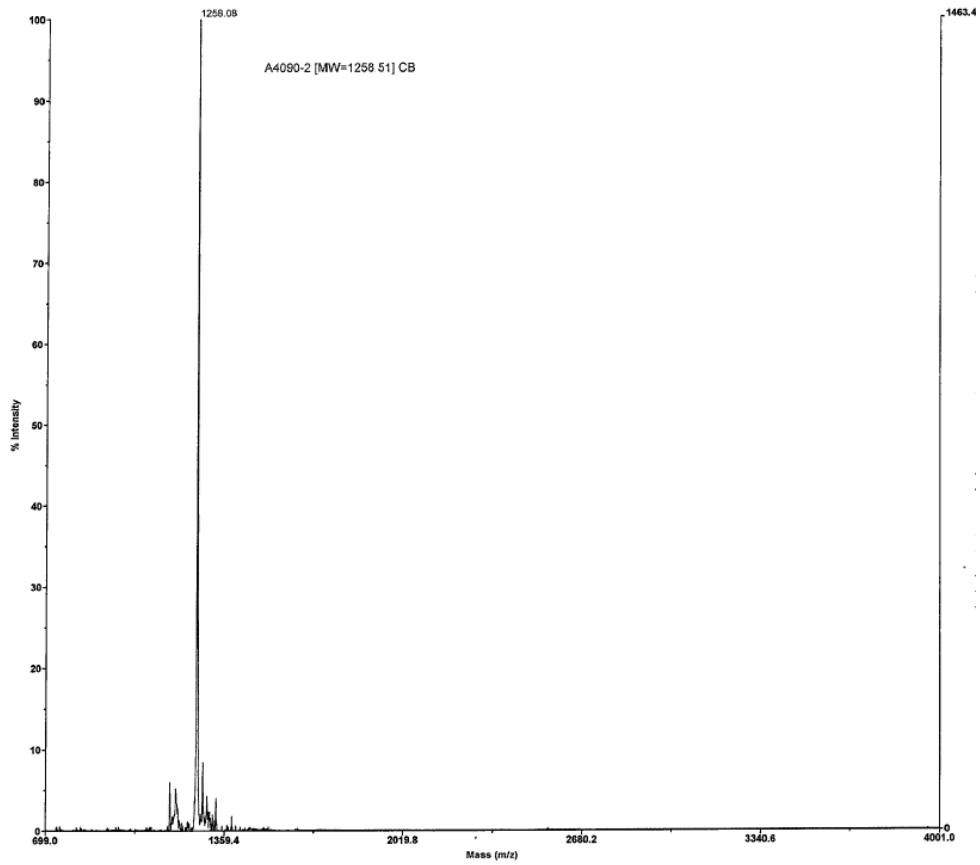

# 11aa

Chromatogram  
C:\LabSolutions\Data\Project1\Anapep25\A4537-1.lcd

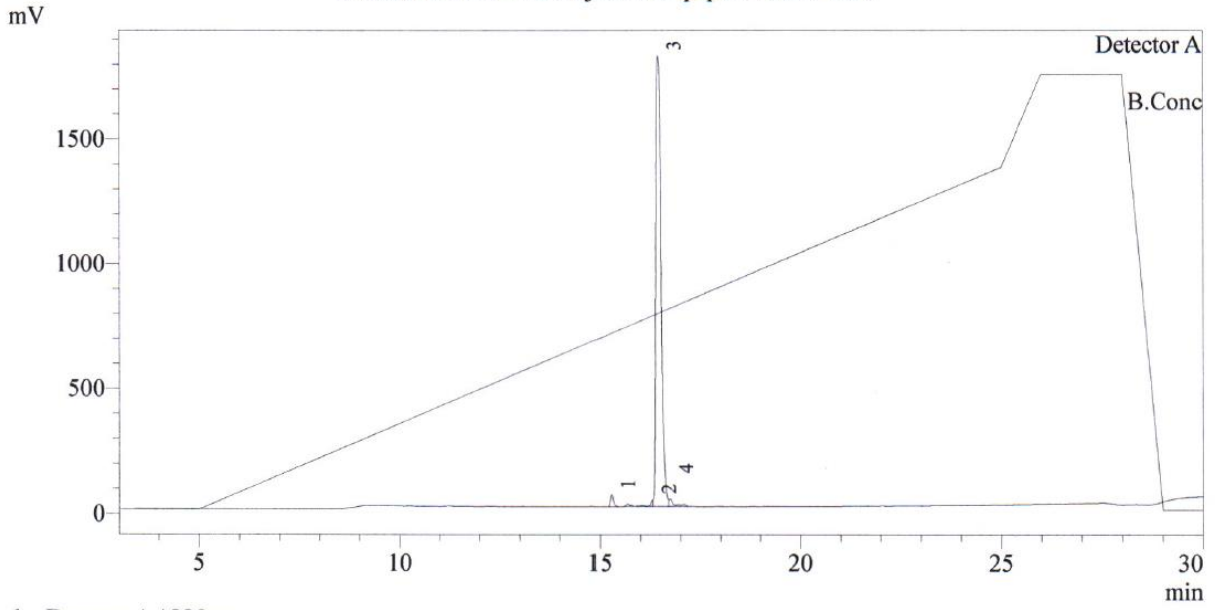

1 Detector A / 220nm

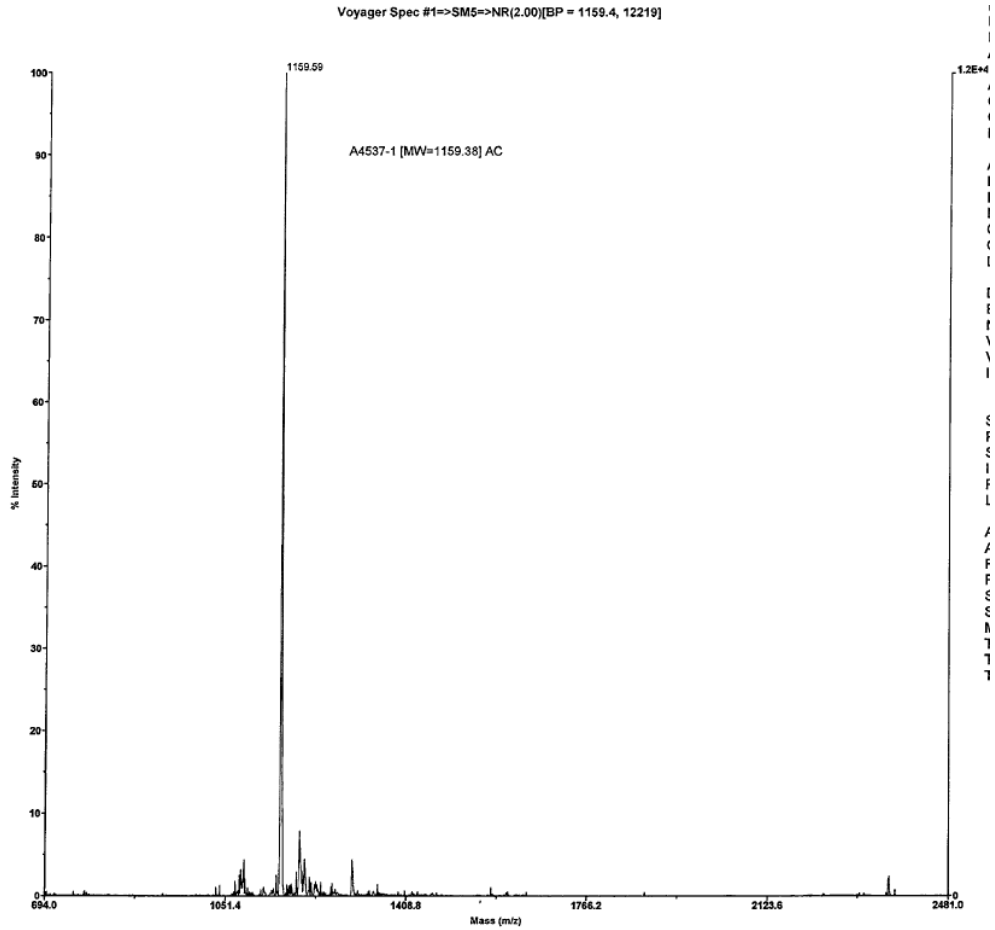

# 10aa

Chromatogram  
C:\LabSolutions\Data\Project1\Anapep25\A4950-1B.lcd

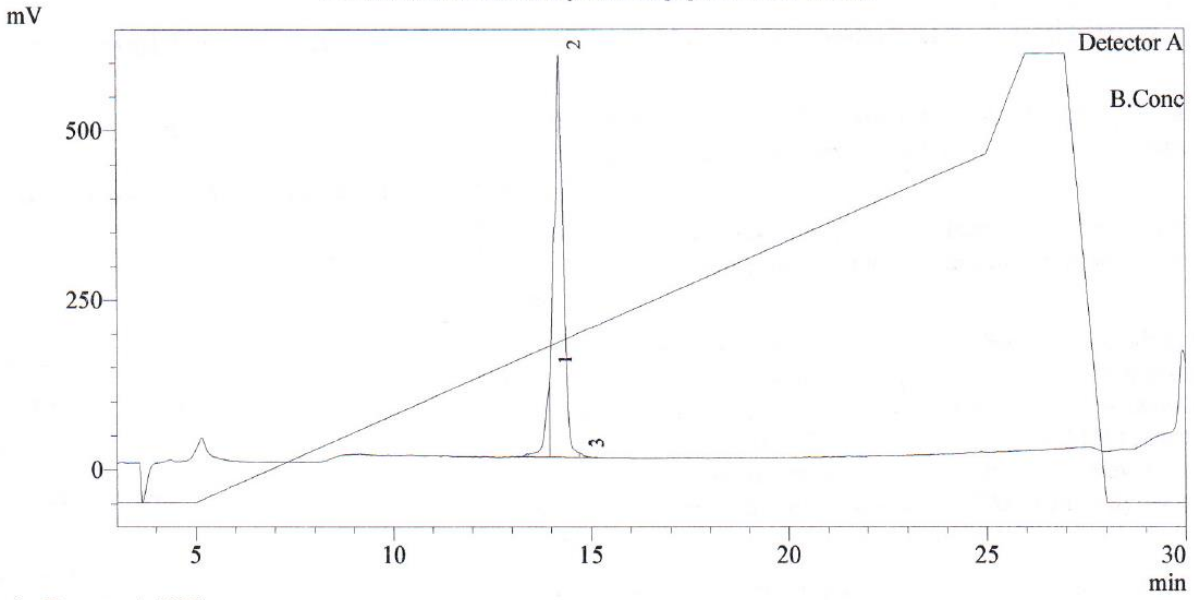

Data: A4950-1 [MW=1088.30] AC\_0001:B4 27 August 2020 11:05:55 Cal:Custom Calibration by MALDI Solutions Admin on 27 August 2020 11:08:02  
Shimadzu MALDI-8020: Tuning Linear, Power 25, P.Ext at 2605.00 (bin 120)  
Processed data (averaged) : 2.1 mV [sum=104.2 mV], Smoothed = 15, profiles # 1 - 50

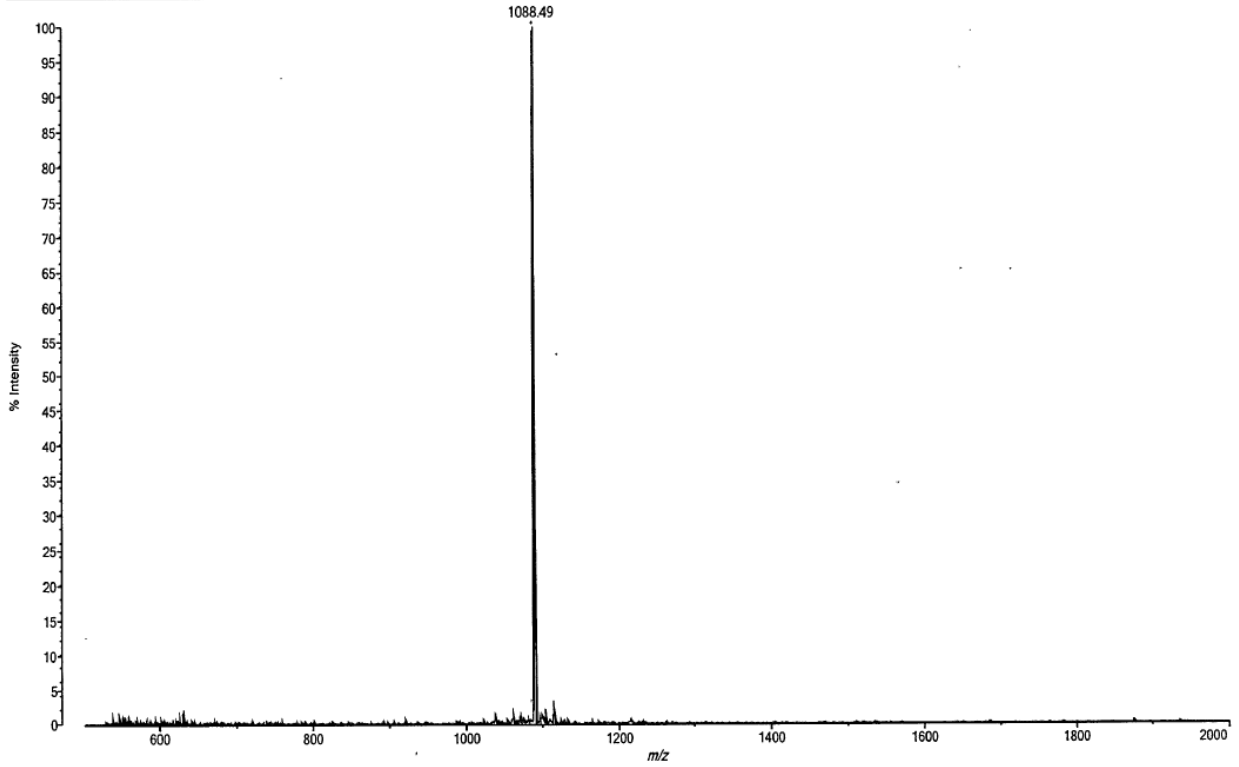

# 9aa

## Chromatogram

C:\LabSolutions\Data\Project1\Anapep25\A4950-2A.lcd

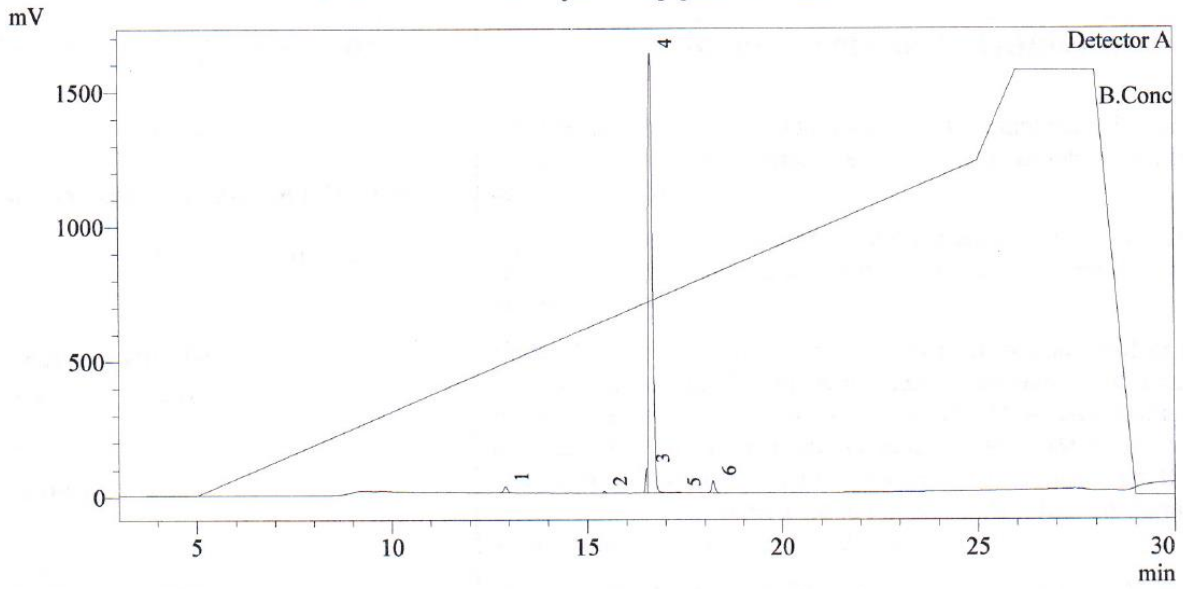

1 Detector A / 220nm

Data: A4950-2 [MW=1031.25] AC\_0001:A4 27 August 2020 11:05:55 Cal:Custom Calibration by MALDI Solutions Admin on 27 August 2020 11:09:47  
Shimadzu MALDI-8020: Tuning Linear, Power 25, P.Ext at 2605.00 (bin 120)

Processed data (averaged): 2.9 mV [sum=142.9 mV], Smoothed = 15, profiles # 1 - 50

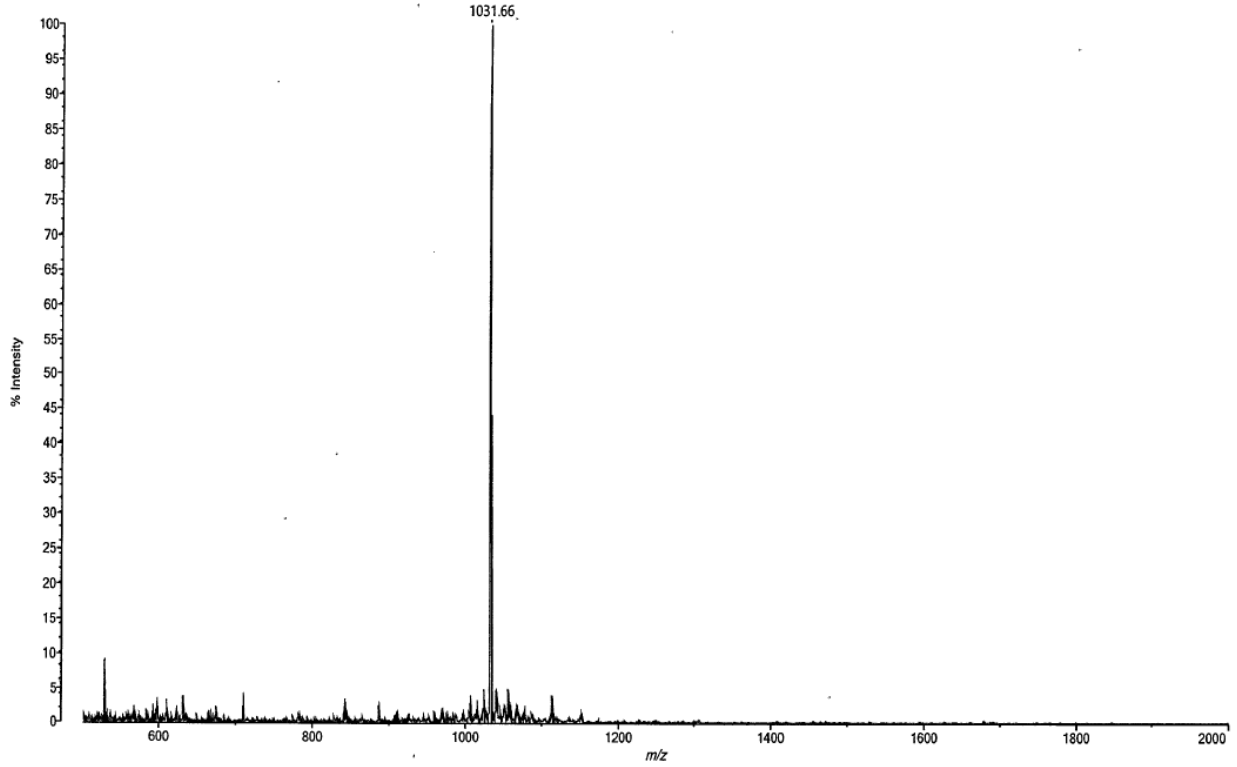



# $\alpha$ 7-EE

## Chromatogram

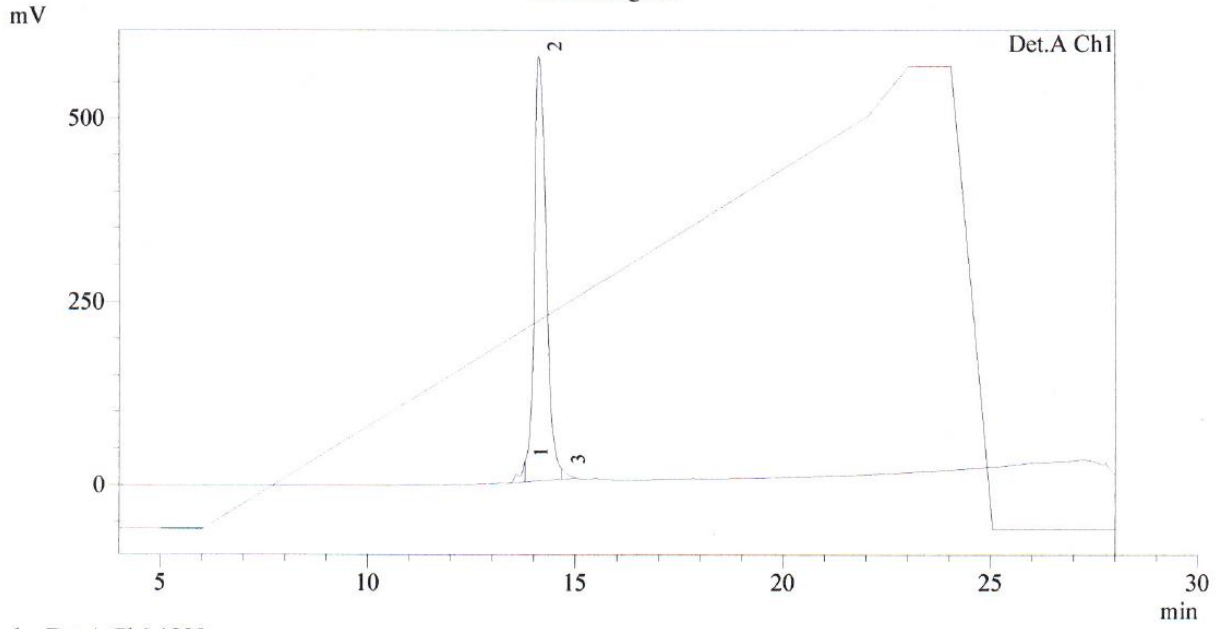

## Voyager Spec #1[BP = 1614.6, 21013]

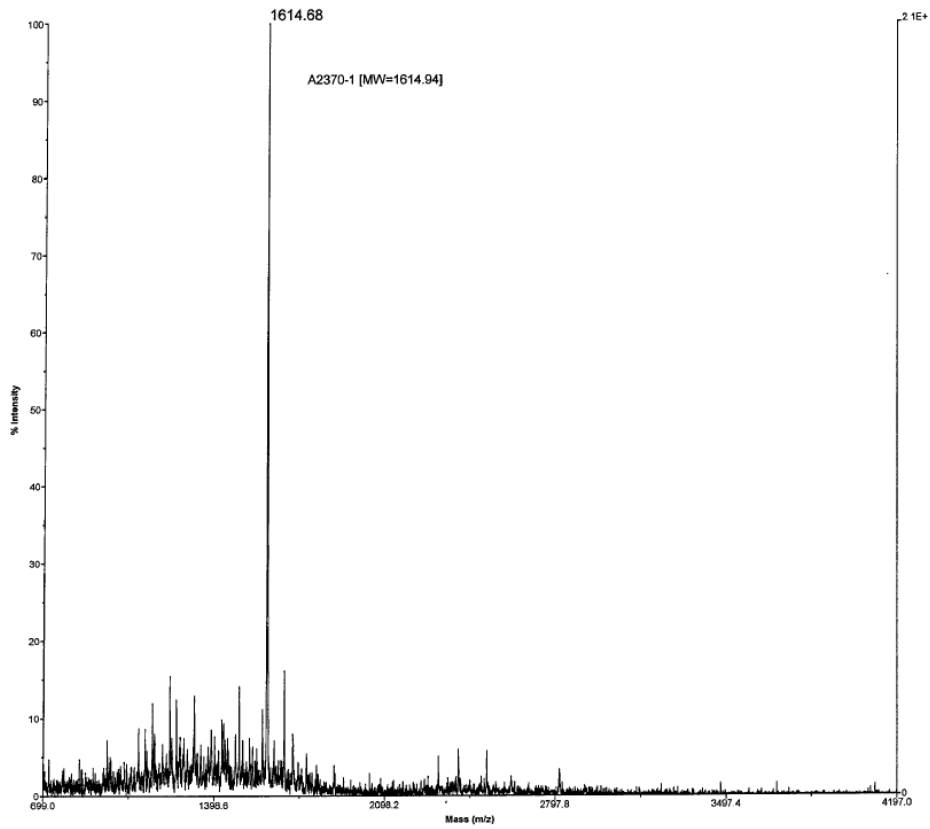

# $\alpha$ 7-II

## Chromatogram

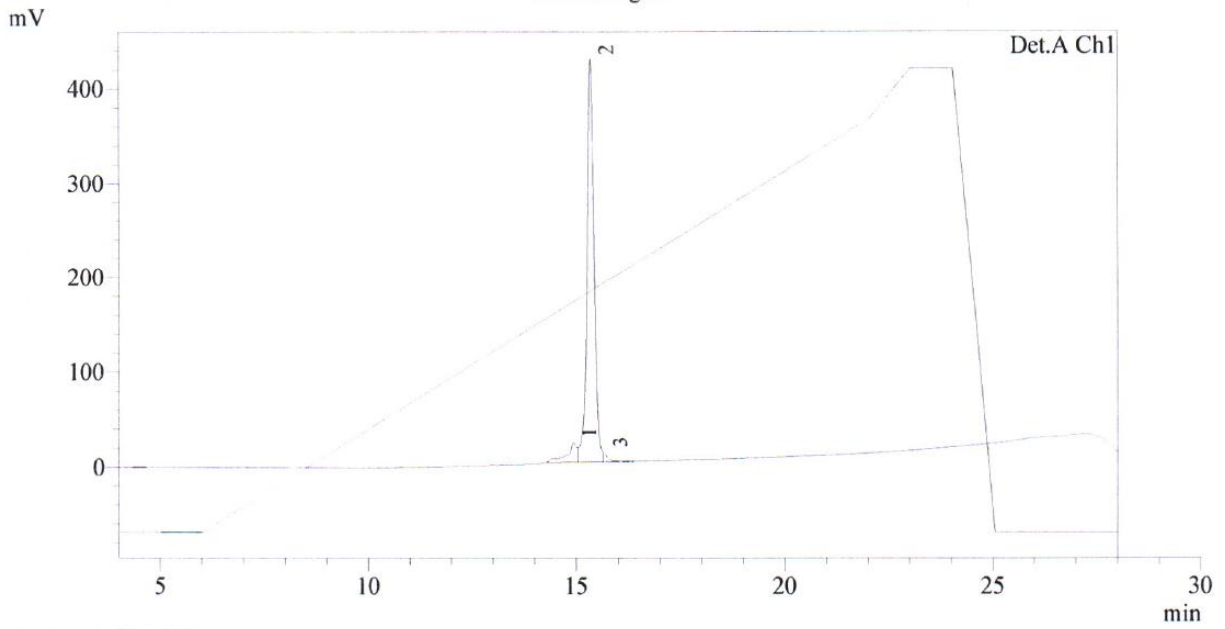

1 Det.A ChI / 220nm

Voyager Spec #1=>NF1.0=>SM19=>SM21=>SM23[BP = 1583.6, 5046]

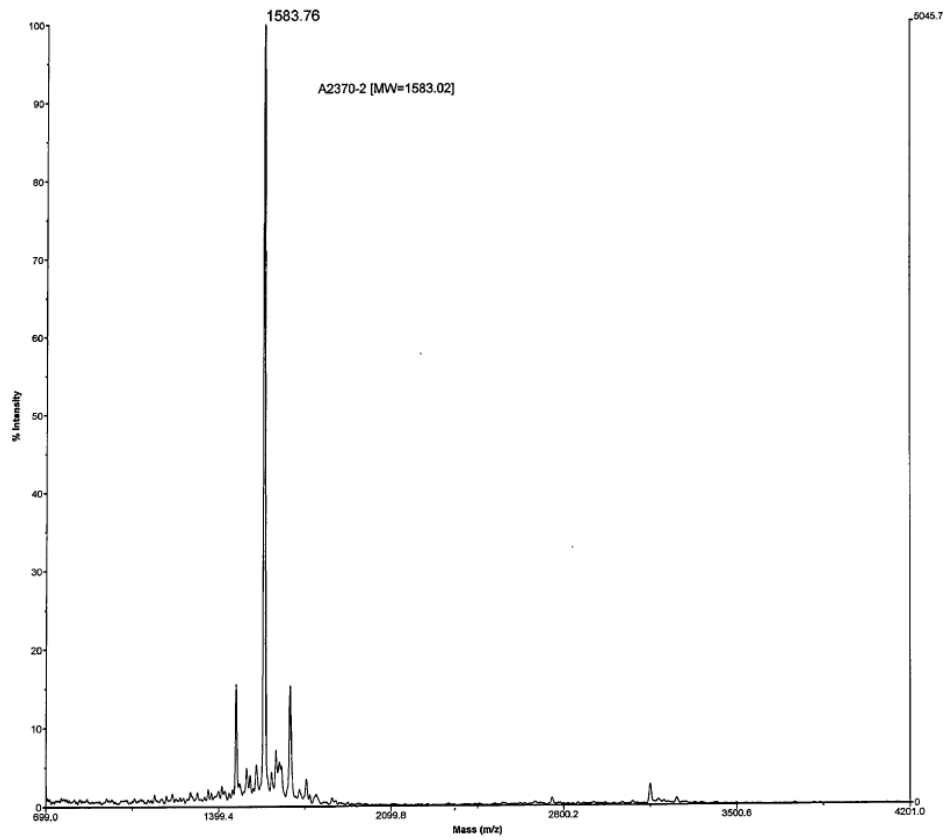

# 12aa-CtoS

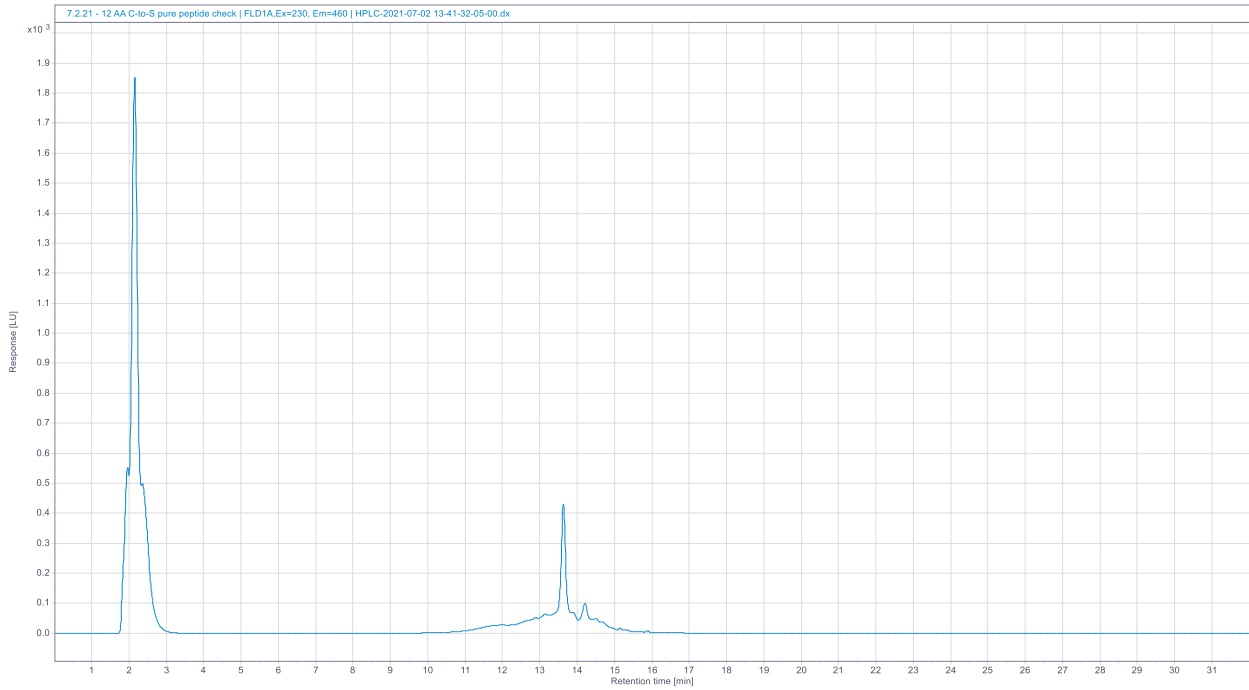

Fragmentor Voltage 175 Collision Energy 0 Ionization Mode ESI

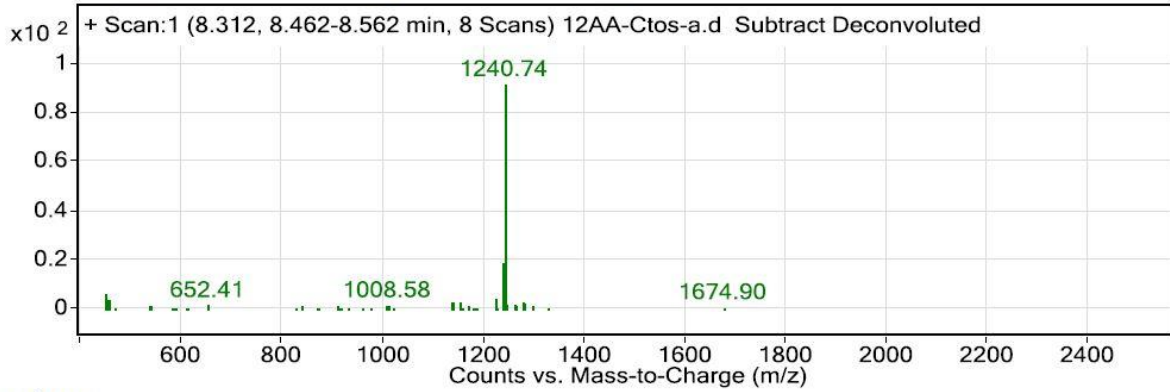

## Peak List

| m/z     | Abund    |
|---------|----------|
| 451.22  | 9551.9   |
| 456.17  | 6375.1   |
| 1223.71 | 6649.6   |
| 1240.69 | 29821.5  |
| 1240.74 | 145934.6 |
| 1241.69 | 20043.2  |
| 1241.74 | 102582.2 |
| 1242.7  | 7643.5   |
| 1242.74 | 39640.6  |
| 1243.75 | 11235.6  |

# 12aa-ALK

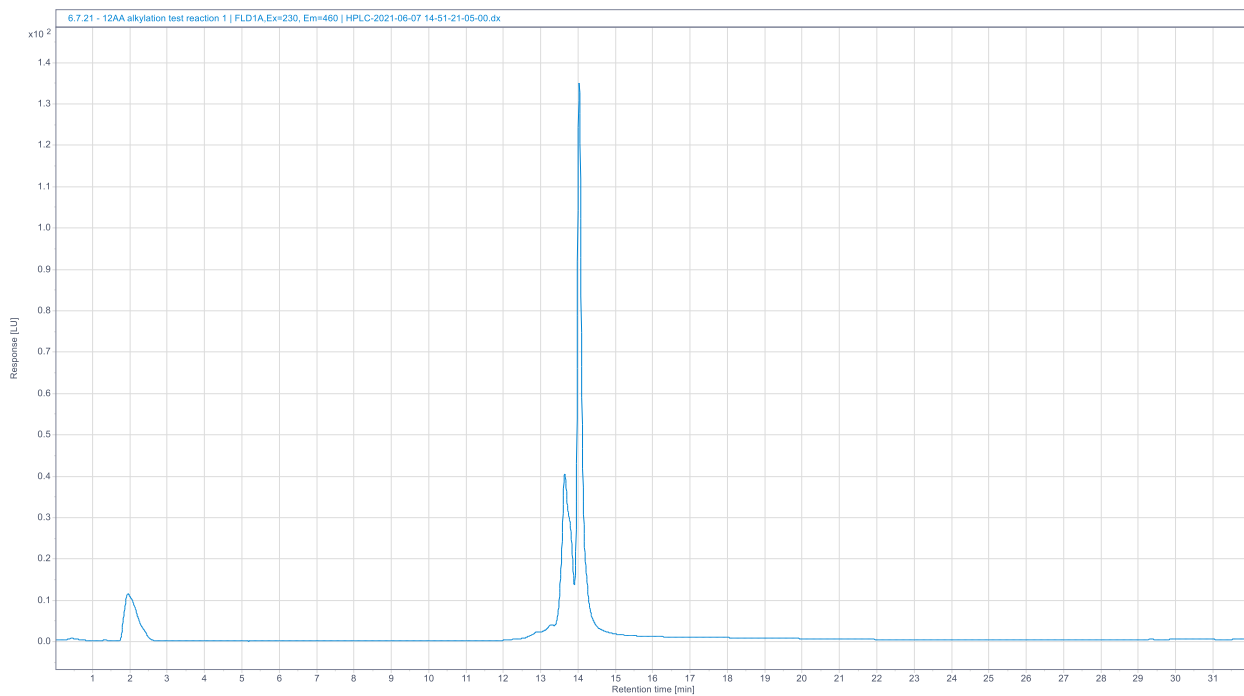

Fragmentor Voltage 175  
Collision Energy 0  
Ionization Mode ESI

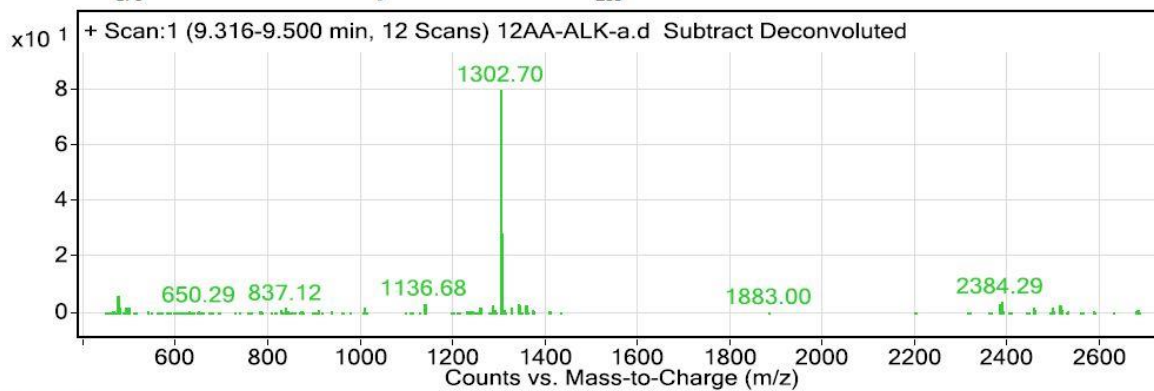

## Peak List

| <i>m/z</i> | Abund   |
|------------|---------|
| 476.24     | 3393.6  |
| 1302.65    | 11376.4 |
| 1302.7     | 43929.8 |
| 1303.66    | 8804.3  |
| 1303.7     | 31902.7 |
| 1304.66    | 4084.4  |
| 1304.7     | 15701.7 |
| 1305.7     | 6313.9  |
